# Supplementary material for: Mutational profile of Brazilian lung adenocarcinoma unveils association of EGFR mutations with high Asian ancestry and independent prognostic role of KRAS mutations
Source: PubMed Central journal article supplement (PMC6397232; doi:10.1038/s41598-019-39965-x), 2019-03-01
Supplement: 41598_2019_39965_MOESM1_ESM.pdf [file 41598_2019_39965_MOESM1_ESM.pdf]

## Title page

### **Mutational profile of Brazilian lung adenocarcinoma unveils association of *EGFR* mutations with high Asian ancestry and independent prognostic role of *KRAS* mutations**

Letícia Ferro Leal<sup>1\*</sup>, Flávia Escremin de Paula<sup>2\*</sup>, Pedro De Marchi<sup>3\*</sup>, Luciano de Souza Viana<sup>3</sup>, Gustavo Dix Junqueira Pinto<sup>3</sup>, Carolina Dias Carlos<sup>2</sup>, Gustavo Noriz Berardinelli<sup>2</sup>, José Elias Miziara<sup>4</sup>, Carlos Maciel da Silva<sup>4</sup>, Eduardo Caetano Albino Silva<sup>5</sup>, Rui Pereira<sup>6,7</sup>, Marco Antonio de Oliveira<sup>8</sup>, Cristovam Scapulatempo-Neto<sup>5</sup>, Rui Manuel Reis<sup>1,2,9,10</sup>

#### **Affiliations:**

<sup>1</sup>Molecular Oncology Research Center, Barretos Cancer Hospital, Barretos, Brazil; <sup>2</sup> Center of Molecular Diagnoses, Barretos Cancer Hospital, Barretos, Brazil; <sup>3</sup>Medical Oncology Department, Barretos Cancer Hospital, Barretos, Brazil; <sup>4</sup>Department of Thoracic surgery, Barretos, Brazil; <sup>5</sup>Department of Pathology, Barretos Cancer Hospital, Barretos, São Paulo, Brazil; <sup>6</sup>Institute of Research and Innovation in Health, University of Porto, Porto, Portugal, <sup>7</sup>Institute of Molecular Pathology and Immunology at the University of Porto (IPATIMUP), Porto, Portugal, <sup>8</sup>Statistics Unity, Barretos Cancer Hospital, Barretos, São Paulo, Brazil; <sup>9</sup>Life and Health Sciences Research Institute (ICVS), Health Sciences School, University of Minho, Braga, Portugal; <sup>10</sup>ICVS/3B's-PT Government Associate Laboratory, Braga/Guimarães, Portugal.

\* These authors contributed equally to the present study.

**Short title:** *EGFR* and *KRAS* mutations in Brazilian lung adenocarcinomas

#### **Corresponding author:**

Rui Manuel Reis, PhD

Molecular Oncology Research Center, Barretos Cancer Hospital

Rua Antenor Duarte Villela, 1331; CEP 14784 400, Barretos, S. Paulo, Brazil

Email: [ruireis.hcb@gmail.com](mailto:ruireis.hcb@gmail.com); Telephone:+551733216600

Supplementary Figure 1

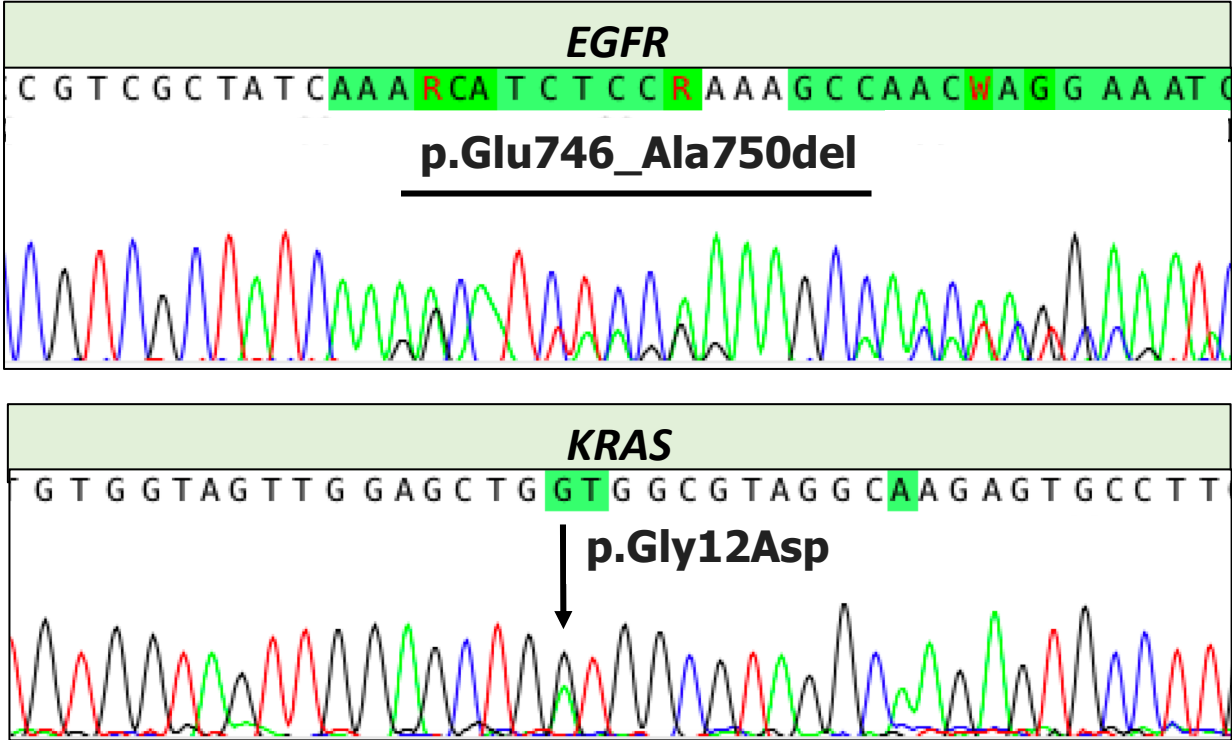

Supplementary Figure 1. Representative electropherogram from the most common *EGFR* (upper panel) and *KRAS* (lower panel) mutations.

**Supplementary Figure 2**

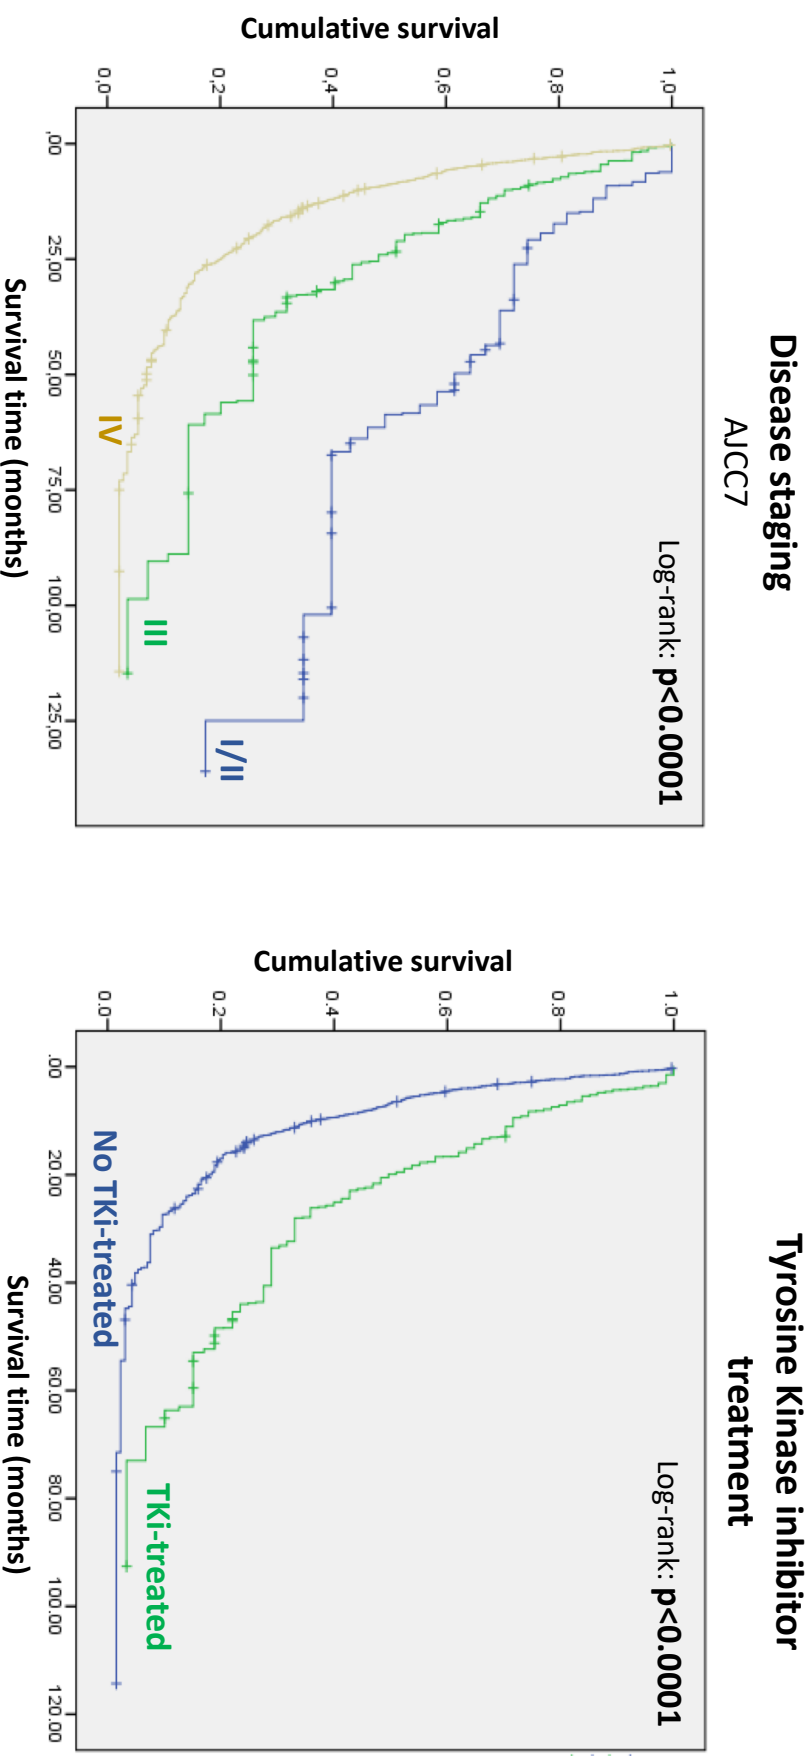

**Supplementary Figure 2.** Kaplan-Meier curves for overall survival of lung adenocarcinoma patients according to disease staging (left panel; Median OS Stage I/II = 58.6 months; Median OS Stage III = 23.7 months; Stage IV = 8.8 months) and Tyrosine Kinase treatment (right panel; Median OS TKI non-treated = 6.7 months; Median OS TKI-treated = 19.9 months). Survival time is presented in months; p values are related to Log-rank test results.

**Supplementary Table 1.** Frequency of all EGFR mutations detected in the present study according to exon distribution.

| <b>Exon</b>                 | <b>n</b> | <b>(%)</b> | <b>n (%) Total</b> |
|-----------------------------|----------|------------|--------------------|
| <b>18</b>                   |          |            |                    |
| p.Gly719Ser                 | 1        | 50         | 2 (1.9%)           |
| p.Gly719Ala                 | 1        | 50         |                    |
| <b>19</b>                   |          |            |                    |
| p.Glu746_Ala750del          | 31       | 58.5       | 53 (49.1%)         |
| p.Glu746_Ser752delinsVal    | 4        | 7.5        |                    |
| p.Glu746_Thr751delinsAla    | 1        | 1.9        |                    |
| p.Leu747_Ala750delinsPro    | 2        | 3.8        |                    |
| p.Leu747_Pro753delinsGln    | 1        | 1.9        |                    |
| p.Leu747_Pro753delinsSer    | 7        | 13.2       |                    |
| p.Leu747_Ser752del          | 2        | 3.8        |                    |
| p.Leu747_Thr751del          | 3        | 5.7        |                    |
| p.Ser752_Ile759del          | 1        | 1.9        |                    |
| p.Asp761Tyr                 | 1        | 1.9        |                    |
| <b>20</b>                   |          |            |                    |
| p.Gln761_Ala763dup          | 2        | 15.4       | 13 (12.0%)         |
| p.Ser768_Asp770dup          | 1        | 7.7        |                    |
| p.Ser768Ile                 | 1        | 7.7        |                    |
| p.Asp770_Asn771insTyr       | 1        | 7.7        |                    |
| p.Asp770_Val774dup          | 1        | 7.7        |                    |
| p.Ans771_His773dupAsnProHis | 1        | 7.7        |                    |
| p.Pro772_His773dup          | 1        | 7.7        |                    |
| p.His773_Val774dup          | 1        | 7.7        |                    |
| p.Gly810Asp                 | 1        | 7.7        |                    |
| p.Thr790Met*                | 3        | 23.1       |                    |
| <b>21</b>                   |          |            |                    |
| p.Glu829Gln                 | 1        | 2.5        | 40 (37.0%)         |
| p.Leu833Val                 | 1        | 2.5        |                    |
| p.Val834Leu                 | 1        | 2.5        |                    |
| p.His850Asp                 | 1        | 2.5        |                    |
| p.Leu858Arg*                | 32       | 80         |                    |
| p.Ala859Thr                 | 1        | 2.5        |                    |
| p.Leu861Gln*                | 3        | 7.5        |                    |

*\*These mutations may appear simultaneously with other EGFR mutations.*

**Supplementary Table 2.** Frequency of all *KRAS* mutations detected in the present study according to codon distribution.

| <b>Codon</b> | <b>n</b> | <b>(%)</b> | <b>n (%) Total</b> |
|--------------|----------|------------|--------------------|
| <b>12</b>    |          |            |                    |
| p.Gly12Cys   | 32       | 40%        | 80 (88.9%)         |
| p.Gly12Val   | 21       | 26.25%     |                    |
| p.Gly12Asp   | 19       | 23.75%     |                    |
| p.Gly12Ala   | 5        | 6.25%      |                    |
| p.Gly12Ser   | 2        | 2.5%       |                    |
| p.Gly12Phe   | 1        | 1.25%      |                    |
| <b>13</b>    |          |            |                    |
| p.Gly13Cys   | 6        | 60%        | 10 (11.1%)         |
| p.Gly13Asp   | 1        | 10%        |                    |
| p.Gly13Glu   | 1        | 10%        |                    |
| p.Gly13Ser   | 1        | 10%        |                    |
| p.Gly13Val   | 1        | 10%        |                    |

**Supplementary Table 3.** Ancestry background categorization according to tercile based on the percentage proportions for all four ethnic groups.

| <b>Ancestry component</b> | <b>Low</b> | <b>Intermediate</b> | <b>High</b> |
|---------------------------|------------|---------------------|-------------|
| <b>ASN</b>                | < 0.028    | 0.028 - 0.055       | > 0.055     |
| <b>AFR</b>                | < 0.027    | 0.027 - 0.125       | > 0.125     |
| <b>EUR</b>                | < 0.698    | 0.698 - 0.865       | > 0.865     |
| <b>AME</b>                | < 0.029    | 0.029 - 0.058       | > 0.058     |

*Cut off values were determined according to tercile categorization.*

**Supplementary Table 4.** Univariate analysis of the association between clinicopathological characteristics, ancestry background and clinical outcome of lung adenocarcinoma patients.

| Variables               | Parameters     | EGFR |        |             |                   | KRAS |        |             |                   |
|-------------------------|----------------|------|--------|-------------|-------------------|------|--------|-------------|-------------------|
|                         |                | n    | WT (%) | Mutated (%) | p-value           | n    | WT (%) | Mutated (%) | p-value           |
| Age                     | ≤ 61 years     | 239  | 78.7   | 21.3        | 0.50              | 238  | 78.2   | 21.8        | 0.41              |
|                         | > 61 years     | 205  | 75.6   | 24.4        |                   | 204  | 81.4   | 18.6        |                   |
| Gender                  | Male           | 232  | 84.5   | 15.5        | <b>&lt;0.0001</b> | 230  | 78.7   | 21.3        | 0.64              |
|                         | Female         | 212  | 69.3   | 30.7        |                   | 212  | 80.7   | 19.3        |                   |
| Self-reported race*     | White          | 342  | 76.9   | 23.1        | 0.40              | 340  | 79.7   | 20.3        | 0.46              |
|                         | Brown          | 64   | 81.2   | 18.8        |                   | 64   | 81.2   | 18.8        |                   |
|                         | Black          | 20   | 85.0   | 15.0        |                   | 20   | 85.0   | 15.0        |                   |
|                         | Yellow         | 7    | 57.1   | 42.9        |                   | 7    | 57.1   | 42.9        |                   |
| Smoking                 | Never smoker   | 135  | 51.1   | 48.9        | <b>&lt;0.0001</b> | 135  | 91.1   | 8.9         | <b>&lt;0.0001</b> |
|                         | Current Smoker | 171  | 90.6   | 9.4         |                   | 169  | 75.7   | 24.3        |                   |
|                         | Former smoker  | 131  | 85.5   | 14.5        |                   | 131  | 73.3   | 26.7        |                   |
| Alcohol consuming       | Never          | 272  | 70.6   | 29.4        | <b>0.002</b>      | 271  | 83.0   | 17.0        | 0.14              |
|                         | Current        | 114  | 86.0   | 14.0        |                   | 113  | 74.3   | 25.7        |                   |
|                         | Former         | 35   | 85.7   | 14.3        |                   | 35   | 82.9   | 17.1        |                   |
| Disease staging         | I              | 28   | 75.0   | 25.0        | 0.17              | 28   | 75.0   | 25.0        | 0.11              |
|                         | II             | 15   | 80.0   | 20.0        |                   | 15   | 60.0   | 40.0        |                   |
|                         | III            | 71   | 87.3   | 12.7        |                   | 71   | 74.6   | 25.4        |                   |
|                         | IV             | 329  | 75.1   | 24.9        |                   | 327  | 82.0   | 18.0        |                   |
| Metastasis at diagnosis | No             | 114  | 83.3   | 16.7        | 0.07              | 114  | 72.8   | 27.2        | 0.09              |
|                         | One site       | 129  | 79.1   | 20.9        |                   | 127  | 80.3   | 19.7        |                   |
|                         | Multiple sites | 200  | 72.5   | 27.5        |                   | 200  | 83.0   | 17.0        |                   |
| PS ECOG                 | 0              | 46   | 63.0   | 37.0        | <b>0.03</b>       | 46   | 67.4   | 32.6        | 0.173             |
|                         | 1              | 233  | 75.5   | 24.5        |                   | 231  | 81.4   | 18.6        |                   |
|                         | 2              | 73   | 80.8   | 19.2        |                   | 73   | 82.2   | 17.8        |                   |
|                         | 3 or 4         | 88   | 85.2   | 14.8        |                   | 88   | 79.5   | 20.5        |                   |
| Loss of weight**        | No             | 209  | 75.6   | 24.4        | 0.78              | 208  | 77.4   | 22.6        | 0.37              |
|                         | < 10 %         | 145  | 75.9   | 24.1        |                   | 145  | 83.4   | 16.6        |                   |
|                         | > 10%          | 69   | 79.7   | 20.3        |                   | 68   | 80.9   | 19.1        |                   |
| Differentiation grade   | G1             | 17   | 82.4   | 17.6        | 0.90              | 17   | 88.2   | 11.8        | 0.68              |
|                         | G2             | 56   | 80.4   | 19.6        |                   | 56   | 76.8   | 23.2        |                   |
|                         | G3             | 82   | 75.6   | 24.4        |                   | 82   | 84.1   | 15.9        |                   |
|                         | G4             | 7    | 85.7   | 14.3        |                   | 7    | 85.7   | 14.3        |                   |
| ASN ancestry            | Low            | 143  | 81.8   | 18.2        | <b>0.03</b>       | 143  | 74.1   | 25.9        | 0.11              |
|                         | Intermediate   | 139  | 81.3   | 18.7        |                   | 139  | 79.9   | 20.1        |                   |
|                         | High           | 145  | 70.3   | 29.7        |                   | 145  | 84.1   | 15.9        |                   |
| AFR ancestry            | Low            | 142  | 77.5   | 22.5        | 0.97              | 142  | 78.9   | 21.1        | 0.73              |
|                         | Intermediate   | 141  | 77.3   | 22.7        |                   | 141  | 81.6   | 18.4        |                   |
|                         | High           | 144  | 78.5   | 21.5        |                   | 144  | 77.8   | 22.2        |                   |
| EUR ancestry            | Low            | 141  | 73.0   | 27.0        | 0.14              | 141  | 79.4   | 20.6        | 1.00              |
|                         | Intermediate   | 141  | 77.3   | 22.7        |                   | 141  | 79.4   | 20.6        |                   |
|                         | High           | 145  | 82.8   | 17.2        |                   | 145  | 79.3   | 20.7        |                   |
| AME ancestry            | Low            | 151  | 76.8   | 23.2        | 0.41              | 151  | 82.8   | 17.2        | 0.45              |
|                         | Intermediate   | 131  | 81.7   | 18.3        |                   | 131  | 77.1   | 22.9        |                   |
|                         | High           | 145  | 75.2   | 24.8        |                   | 145  | 77.9   | 22.1        |                   |

n, number of patients; WT, wild-type; p-value: significance of t test.; ASN, Asian ancestry; AFR, African ancestry; EUR, European ancestry; AME, Amerindian ancestry; PS ECOG, performance status ECOG (Eastern Cooperative Oncology Group); Ref., reference group. \*Self-reported race according to Brazilian Institute of Geography and Statistics (IBGE). \*\*Loss of weight <10% and >10% of total body weight. Significant associations are indicated in bold.

**Supplementary Table 5.** TKi response regarding *EGFR* mutations per exon.

| <b>TKi response vs. EGFR mutation (per exon)</b> |                |                     |           |           |       |       |
|--------------------------------------------------|----------------|---------------------|-----------|-----------|-------|-------|
|                                                  |                | <b>TKi response</b> |           |           | Total |       |
|                                                  |                | <b>CR/PR</b>        | <b>SD</b> | <b>DP</b> |       |       |
| <b>EGFR mutations per exon</b>                   | <b>Exon 19</b> | <i>n</i>            | 29        | 5         | 2     | 36    |
|                                                  |                | <i>n (%)</i>        | 85.3%     | 55.6%     | 22.2% | 69.2% |
|                                                  | <b>Exon 20</b> | <i>n</i>            | 1         | 0         | 5     | 6     |
|                                                  |                | <i>n (%)</i>        | 2.9%      | 0.0%      | 55.6% | 11.5% |
|                                                  | <b>Exon 21</b> | <i>n</i>            | 4         | 4         | 2     | 10    |
|                                                  |                | <i>n (%)</i>        | 11.8%     | 44.4%     | 22.2% | 19.2% |
| <b>Total</b>                                     | <i>n</i>       | 34                  | 9         | 9         | 52    |       |

TKi, tyrosine kinase inhibitor; CR, complete response; PR, partial response; SD, stable disease; DP, disease progression; *n*, number of cases in each category. **Fisher's exact test: p<0.0001**



**Supplementary Table 6.** Detailed information about surgical resection.

|                                  | <b>n</b> | <b>Surgery type</b> | <b>Additional information</b>       |
|----------------------------------|----------|---------------------|-------------------------------------|
| <b><i>Surgical resection</i></b> | 51       | Lobectomy n=46      | IA (n=8); IB (n=12)                 |
|                                  |          | Segmentectomy n=4   | IIA (n=7); IIB (n=4)                |
|                                  |          | Pneumectomy n= 1    | IIIA (n=12); IIIB (n=1)<br>IV (n=7) |

**Supplementary Table 7.** Summary of treatment regimens in *EGFR*-mutated and *EGFR* wild-type patients.

|                              | n   | Adjuvant<br>(n) | Neoadjuvant/<br>induction (n) | TKi<br>(n) | ≥ 1 palliative<br>line (n) | Number of<br>palliative lines<br>(average) |
|------------------------------|-----|-----------------|-------------------------------|------------|----------------------------|--------------------------------------------|
| <b><i>EGFR-mutated</i></b>   | 101 | 1               | 4                             | 71         | 87                         | 2.29                                       |
| <b><i>EGFR wild-type</i></b> | 343 | 9               | 31                            | 24         | 188                        | 1.83                                       |

*n*, number of patients; TKi, patients tyrosine kinase inhibitor

**Supplementary Table 8.** Detailed information about cytotoxic treatment regimens in *EGFR*-mutated patients.

| <b>Cytotoxic chemotherapy regimens</b>                 |                           |
|--------------------------------------------------------|---------------------------|
| <b><i>Adjuvant therapy</i></b>                         | Cisplatin + vinorelbine   |
| <b><i>Neoadjuvant/induction therapy</i></b>            | Carboplatin + paclitaxel  |
| <b><i>1<sup>st</sup> cytotoxic palliative line</i></b> | Carboplatin + paclitaxel  |
|                                                        | Carboplatin + gemcitabine |
|                                                        | Cisplatin + vinorelbine   |
|                                                        | Cisplatin + pemetrexed    |
|                                                        | Gemcitabine               |
|                                                        | Paclitaxel                |

**Supplementary Table 9.** Detailed information about cytotoxic treatment regimens in *EGFR* wild-type patients.

| <b>Cytotoxic chemotherapy regimens</b>                 |                          |
|--------------------------------------------------------|--------------------------|
| <b><i>Adjuvant therapy</i></b>                         | Cisplatin + vinorelbine  |
|                                                        | Carboplatin + Paclitaxel |
| <b><i>Neoadjuvant/induction therapy</i></b>            | Carboplatin + Paclitaxel |
|                                                        | Carboplatin + Etoposide  |
|                                                        | Cisplatin+Etoposide      |
| <b><i>1<sup>st</sup> cytotoxic palliative line</i></b> | Carboplatin+Paclitaxel   |
|                                                        | Carboplatin+Docetaxel    |
|                                                        | Carboplatin+Gencitabine  |
|                                                        | Cisplatin+ Etoposide     |
|                                                        | Cisplatin+Gencitabine    |
|                                                        | Cisplatin+Paclitaxel     |
|                                                        | Cisplatin + Pemetrexed   |
|                                                        | Vinorelbine              |
|                                                        | Gencitabine              |
| Paclitaxel                                             |                          |
